# Supplementary material for: Olefin coordination in copper(I) complexes of bis(2-pyridyl)amine
Source: Royal Society of Chemistry journal article supplement (doi:10.1039/b814829e), 2008-12-03
Supplement: b814829e.pdf [file b814829e.pdf]

# **Olefin Coordination in Copper(I) Complexes of *Bis(2-pyridyl)amine***

John J. Allen and Andrew R. Barron\*

*Department of Chemistry and Energy and Environmental Systems Center,  
Rice University, Houston, Texas 77005, USA*

Supplementary materials

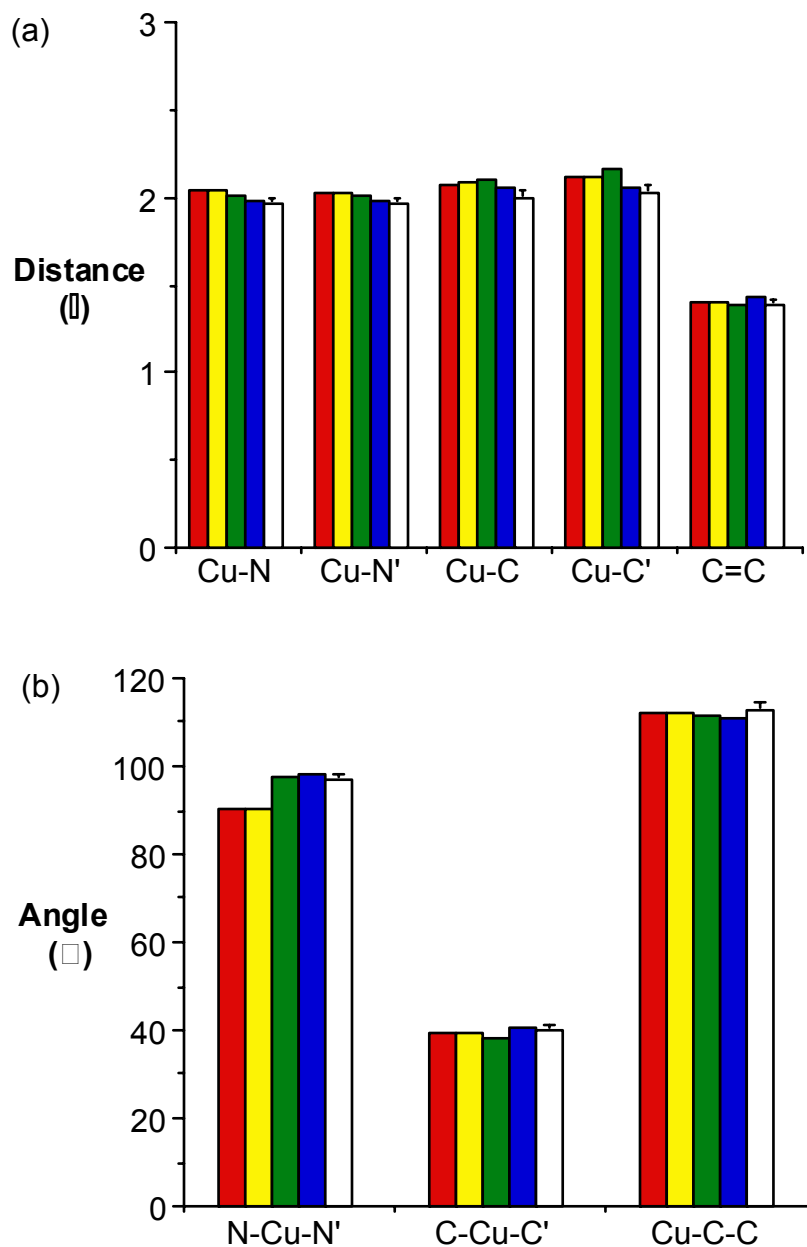

**Figure S1.** Plot of (a) bond lengths and (b) bond angles for calculated structure of [Cu(H-dpa)(1-octene)]<sup>+</sup>, using MOPAC (■), RHF STO-3G (■), RB3LYP LANL2DZ/6-311++G\* (■), and RMP2-FC LANL2DZ/6-311++G\* (■) in comparison with experimentally determined values (□).

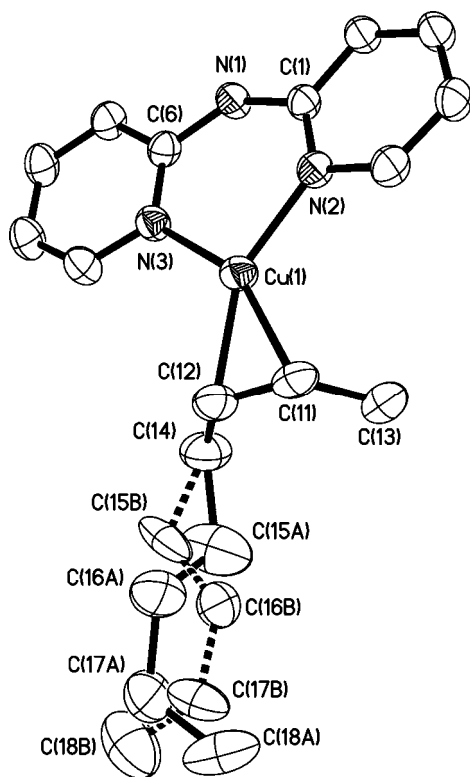

**Figure S2.** The structure of the  $[\text{Cu}(\text{H-dpa})(\text{cis-2-octene})]^+$  cation in compound **6** showing the positional disorder of the  $\text{C}_5\text{H}_{11}$  group.

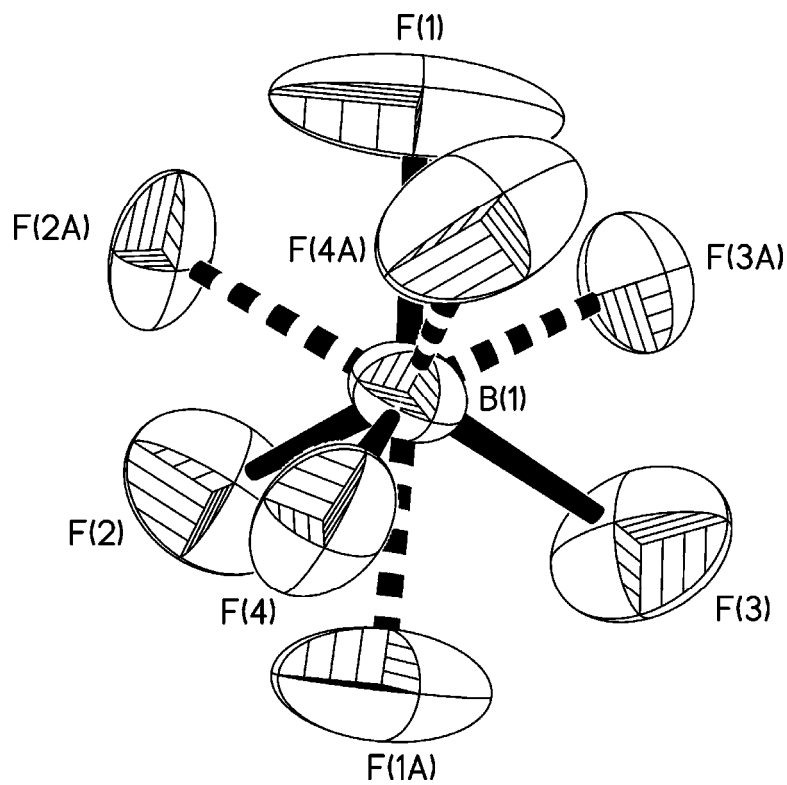

**Figure S3.** The structure of the  $\text{BF}_4^-$  anion in compound **8** showing the positional disorder.

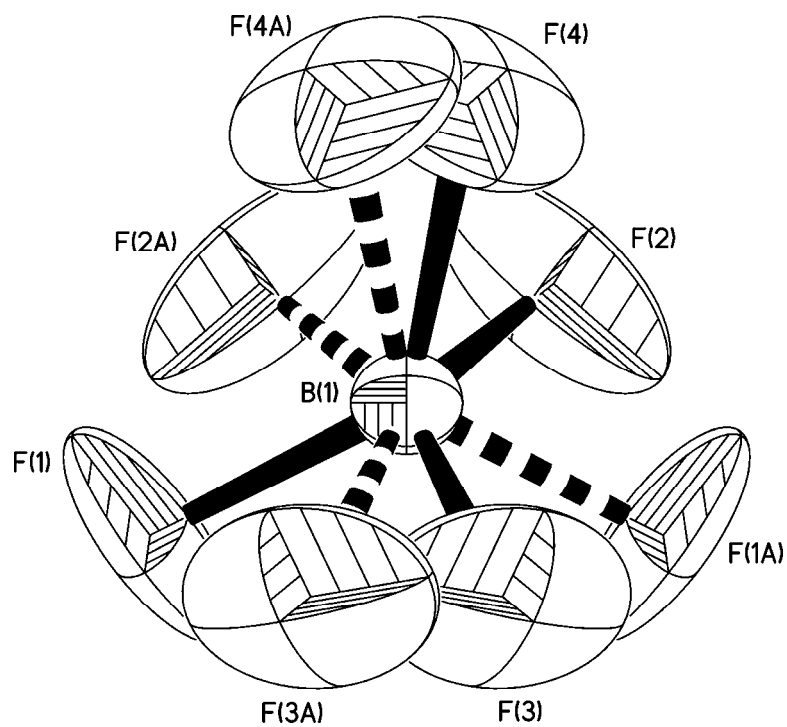

**Figure S4.** The structure of the  $\text{BF}_4^-$  anion in compound **11** showing the positional disorder.

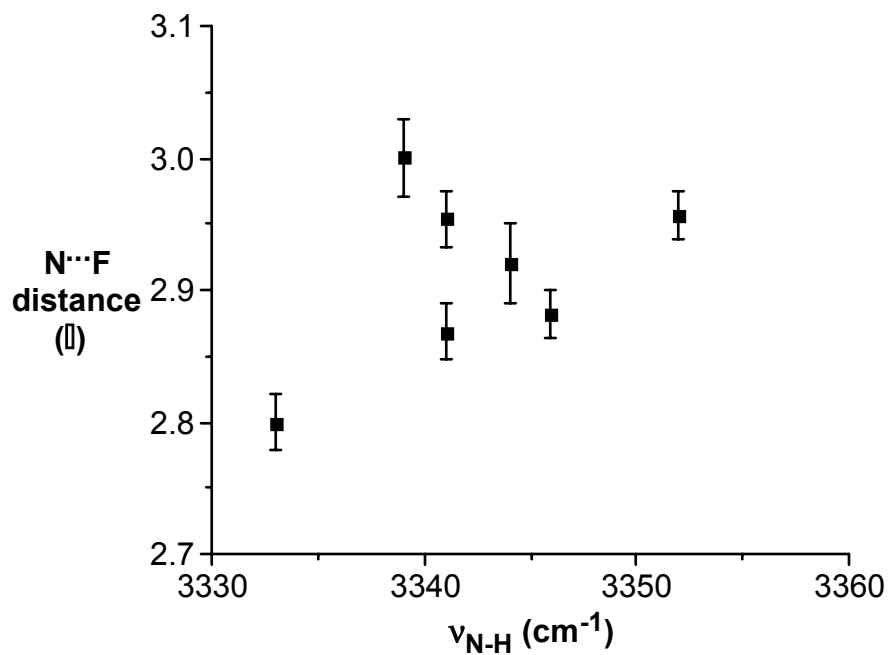

**Figure S5.** Plot of inter-ion N...F distance versus the IR N-H stretching frequency of the H-dpa ligand in [Cu(H-dpa)(olefin)]BF<sub>4</sub>.

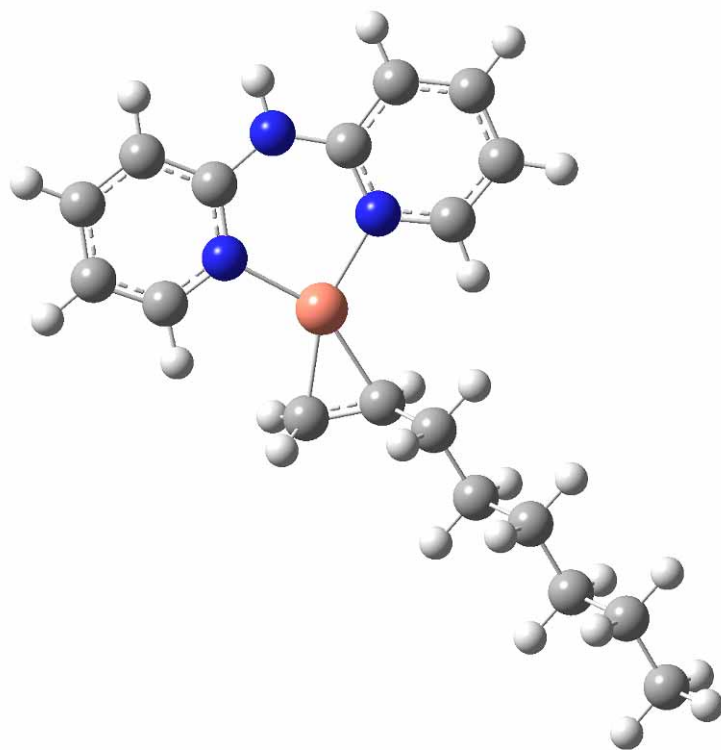

**Figure S6.** The structure of the  $[\text{Cu}(\text{H-dpa})(1\text{-octene})]^+$  cation calculated using MOPAC.

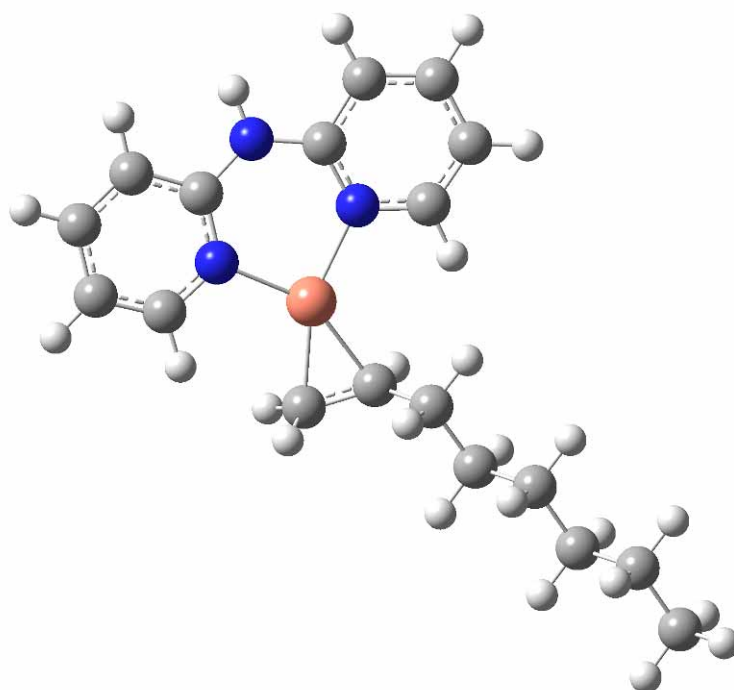

**Figure S7.** The structure of the  $[\text{Cu}(\text{H-dpa})(1\text{-octene})]^+$  cation calculated using RHF STO-3G.



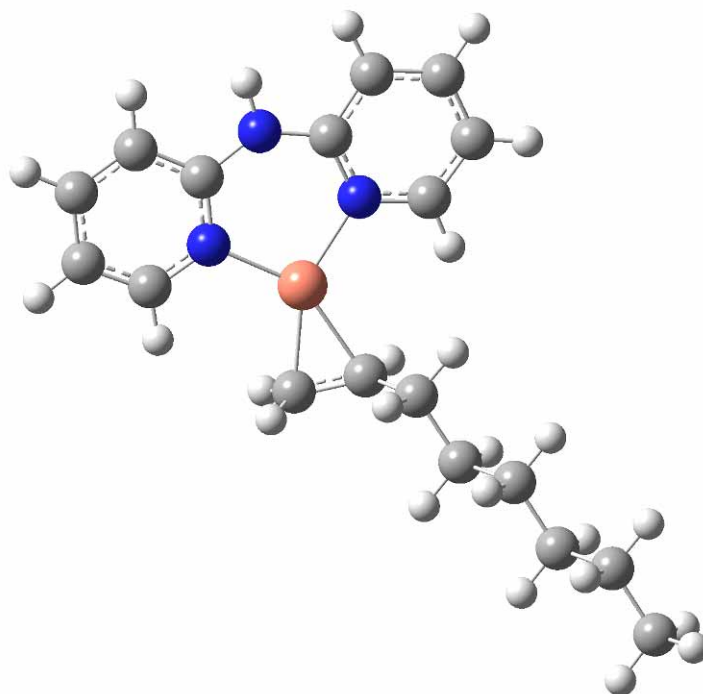

**Figure S8.** The structure of the  $[\text{Cu}(\text{H-dpa})(1\text{-octene})]^+$  cation calculated using RB3LYP LANL2DZ/6-311++G\*.

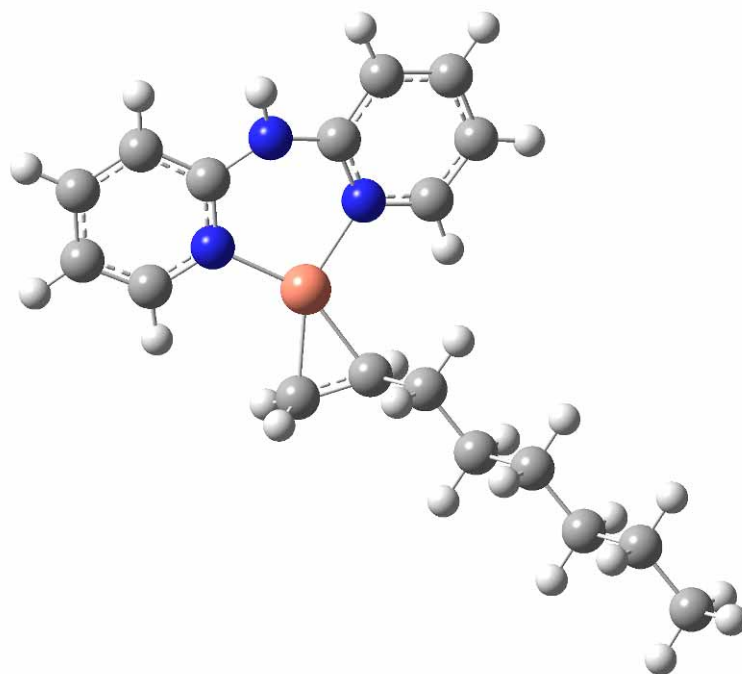

**Figure S6.** The structure of the  $[\text{Cu}(\text{H-dpa})(1\text{-octene})]^+$  cation calculated using RMP2-FC LANL2DZ/6-311++G\*.
